# Supplementary material for: Development of New Tools to Detect Colistin-Resistance among Enterobacteriaceae Strains
Source: Hindawi journal article supplement (doi:10.1155/2018/3095249), 2018-12-05
Supplement: f1 [file 3095249.f1.pdf]

1 **Supplementary data**

2 **Table S1. Home-made polymyxin containing agar**

3 **Table S2. Comparison of different polymyxin B susceptibility testing methods to detect**  
4 **polymyxin B resistance in Gram-negative clinical isolates.**

5 **Table S3. Other comparative AST methods.**

6

7

8 **Table S1. Home-made polymyxin containing agar.** VAN: vancomycin, CTX: cefotaxime; AB: amphotericin B

| Used on:       | Agar                                             | Colistin<br>( $\mu\text{g/mL}$ ) | Other antimicrobial<br>drugs ( $\mu\text{g/mL}$ ): | Rreference |
|----------------|--------------------------------------------------|----------------------------------|----------------------------------------------------|------------|
| Isolates       | MH                                               | 2                                |                                                    | [9]        |
| Cecal samples  | 1-BPW                                            | 2                                |                                                    | [26]       |
|                | 2-MacConkey                                      | 2                                |                                                    |            |
| isolates       | MacConkey                                        | 2                                |                                                    | [27]       |
| Stool samples  | 1-LB broth                                       | 2                                |                                                    | [28]       |
|                | 2-MacConkey agar                                 | $\pm 4$                          |                                                    |            |
|                | Or CHROMagar <sup>TM</sup> Orientation<br>Medium | 4                                | 8 VAN $\pm$ 2 CTX                                  |            |
| Samples        | MacConkey                                        | 2                                |                                                    | [29]       |
| Faecal samples | LB                                               | 2                                | 50 VAN                                             | [30]       |
| Faecal samples | LB                                               | 4                                | 5 AB                                               | [31]       |
| Stool samples  | 1-EE                                             |                                  |                                                    | [32]       |
|                | 2-LB                                             | 4                                | 10 mg/L VAN<br>5 mg/L AB                           |            |
| Faecal samples | 1- EE broth                                      | 2                                |                                                    | [33]       |
|                | 2-MacConkey                                      | 4                                |                                                    |            |
| Isolate        | COS                                              | 2                                |                                                    | [34]       |

9

10

11 **Table S2. Comparison of different polymyxin B susceptibility testing methods to detect polymyxin B resistance in Gram-negative clinical isolates.**

| Bacterial species                      | Reference method | MIC breakpoint | MIC range<br>% resistant | MIC50           | MIC90          | Methods               | CA<br>≥90% | EA<br>≥90% | ME<br>≤1.5% | VME<br>≤1.5% | MiE  | Reference |
|----------------------------------------|------------------|----------------|--------------------------|-----------------|----------------|-----------------------|------------|------------|-------------|--------------|------|-----------|
| 76 <i>Enterobacteriaceae</i>           | BMD              | S≤2 µg/mL      | 0.06->64                 | 4               | 8              | Vitek2                | 94.7       | 96.1       | 6.1         | 3.7          |      | [105]     |
| 18 <i>E.coli</i> (13 <i>mcr-1</i> )    |                  | R≥4 µg/mL      | 35.5%                    | 0.12            | 0.5            | Sensititre            | 94.7       | 96.1       | 6.1         | 3.7          |      |           |
| 31 <i>K. pneumoniae</i> 2 <i>mcr-1</i> |                  |                |                          |                 |                | Etest                 | 89.5       | 48.7       | 1.9         | 26.1         |      |           |
| 1 <i>E. aerogenes mcr-1</i>            | AD               | S≤2 µg/mL      | 0.25-16                  | 2               | 4              | DD 300 U              | 72.8       | NA         | 0           | 70.6         | 8.6  | [86]      |
| 70 <i>S. maltophilia</i> 15R           |                  | R≥4 µg/mL      | 22.7%                    |                 |                | Etest                 | 77.3       | 89.4       | 13.2        | 47.1         | NA   |           |
| 200 Gram-negative including:           | BMD              | S≤2 µg/mL      |                          | ≤1 <sup>a</sup> | 2 <sup>a</sup> | DD 10 µg <sup>1</sup> | 94         | NA         | 0           | 37.5         | 0    | [88]      |
| 60 <i>A. baumannii</i>                 |                  | R≥4 µg/mL      | 16%                      | ≤1 <sup>b</sup> | 2 <sup>b</sup> | DD 10 µg <sup>2</sup> | 94         |            | 0           | 37.5         | 0    |           |
| 80 <i>P. aeruginosa</i>                |                  |                |                          |                 | 2 <sup>c</sup> | 2 <sup>c</sup>        |            |            |             |              |      |           |
| c. 12 <i>S.maltophilia</i>             |                  |                |                          |                 |                |                       |            |            |             |              |      |           |
| 35 representatives                     |                  |                |                          | ≤1->128<br>40%  |                |                       | AD         | 97.1       | 91.4        | 47.6         | 0    |           |
| 78 <i>P. aeruginosa</i>                | BMD              | S≤2 µg/mL      | <0.25-8                  | 0.5             | 1              | Etest                 | 90         | 33         |             | 1.           | 48.7 | [95]      |
|                                        |                  | I = 4 µg/mL    | 0.9%                     |                 |                | DD                    | 97.3       | NA         | 11.5        |              |      |           |
|                                        |                  | R≥8 µg/mL      |                          |                 |                |                       |            |            |             |              |      |           |
| 281 <i>Enterobacteriaceae</i>          | BMD              | S≤2 µg/mL      |                          |                 |                | Etest                 | 49.8       | 40.9       | 0           | 12.5         |      | [78]      |
|                                        |                  | R≥4 µg/mL      | 8.5%                     |                 |                | AD                    | 38.1       | 50.2       | 2.7         | 8.3          |      |           |
|                                        |                  |                |                          |                 |                | DD 300U               | 98.9       | NA         | 0           | 12.5         |      |           |
| 48 <i>K. pneumoniae</i>                | BMD              | S≤2 µg/mL      |                          | ≤0.25           | 8              | Etest                 | 75         | 18.7       | 26.8        | 14.3         | NA   | [94]      |
|                                        |                  | R≥4 µg/mL      | 14.6%                    |                 |                |                       |            |            |             |              |      |           |
| 63 <i>E. coli</i>                      | BMD              | S≤2 µg/mL      | 0.12-16                  |                 | 2              | BMD-P80               | 97.6       | 21         | 0           | 12.5         |      | [74]      |
| 61 <i>K. pneumoniae</i>                |                  | R≥4 µg/mL      | 19.4%                    |                 | 1              |                       |            |            |             |              |      |           |
| 60 <i>Acinetobacter spp.</i>           |                  |                |                          |                 | 2              |                       |            |            |             |              |      |           |
| 63 <i>P. aeruginosa</i>                |                  |                |                          |                 | 2              |                       |            |            |             |              |      |           |
| 501 <i>P. aeruginosa</i> (401 CF)      | AD               | S≤4 µg/mL      | ≤0.5->16 µg/mL           | 2               | 2              | BMD 24h               | 96         |            | 22.8        | 1.7          |      | [82]      |
| 50 <i>A. xylosoxidans</i>              |                  | R≥8 µg/mL      | 11%                      |                 | 4              | 8                     | BMD 48h    | 93.6       |             | 8.4          | 3.6  |           |
| 50 <i>S. maltophilia</i>               |                  |                |                          | 4               | 16             |                       |            |            |             |              |      |           |
| 10 <i>P. aeruginosa</i>                | BMD              | 10             | ≤0.25-4                  | 0.5             | 1              | Etest MH :            |            |            |             |              |      | [99]      |
| 10 <i>A. baumannii</i>                 |                  |                |                          | 0.5             | 4              | Difco                 | 100        | 100        | 0           | 0            | 0    |           |
|                                        |                  |                |                          |                 |                | Merck                 | 95         | 80         | 0           | 1            | 0    |           |
|                                        |                  |                |                          |                 |                | Oxoid                 | 80         | 80         | 0           | 0            | 2    |           |
|                                        |                  |                |                          |                 |                | HiMedia               | 90         | 90         | 0           | 0            | 4    |           |

12 CA: Categorical agreement, EA: Essential agreement, VME: very major error, ME: major error, MiE: minor error, AD: Agar Dilution, BMD: Broth Microdilution, DD: disk  
13 diffusion, MH: Mueller Hinton, ISO: ISO Sensitest agar. Italic values indicate number of error and not the percentage for VME or ME when a too few number of resistant  
14 susceptible strains were tested respectively.

15

16

**Table S3. Other comparative AST methods.**

| Bacterial species                                                                                                                                                                     | Reference method   | MIC breakpoint                                                | MIC range % resistant      | MIC50                              | MIC90                              | Methods                                                                                                                                                                                                      | CA ≥90%      | EA ≥90%  | ME ≤1.5% | VME ≤1.5%                                 | MiE        | Reference |
|---------------------------------------------------------------------------------------------------------------------------------------------------------------------------------------|--------------------|---------------------------------------------------------------|----------------------------|------------------------------------|------------------------------------|--------------------------------------------------------------------------------------------------------------------------------------------------------------------------------------------------------------|--------------|----------|----------|-------------------------------------------|------------|-----------|
| 101 KP                                                                                                                                                                                | Etest              | S≤2 µg/mL<br>R≥4 µg/mL                                        | 0.25-48<br>16.8%           | 0.75                               | 16                                 | Microscan                                                                                                                                                                                                    | 76.3         | 88.1     | 11.9     | 11.8                                      |            | [93]      |
| 146 isolates<br>56 <i>P. aeruginosa</i><br>29 <i>Acinetobacter</i> spp.<br>61 <i>Enterobacteriaceae</i>                                                                               | NA                 |                                                               |                            |                                    |                                    | BMD<br>V-bottom<br>+P80<br>U bottom<br>+ P-80                                                                                                                                                                |              |          |          |                                           |            | [75]      |
| 169 <i>E. coli</i><br>157 <i>K. pneumoniae</i><br>163 <i>P. aeruginosa</i>                                                                                                            | BMD                |                                                               |                            |                                    |                                    | BMD-P80                                                                                                                                                                                                      |              |          |          |                                           |            | [73]      |
| 778 Gram-negative<br>226 <i>A. baumannii</i><br>124 <i>P. aeruginosa</i><br>250 <i>K. pneumoniae</i><br>102 <i>E. coli</i><br>60 <i>Enterobacter</i> spp.<br>36 <i>S. maltophilia</i> | Etest              | S≤2 µg/mL<br>I = 4 µg/mL<br>R≥8 µg/mL                         | ≤0.5->16<br>13.1%          | 0.5<br>1<br>0.5<br>0.5<br>0.5<br>8 | 0.5<br>2<br>16<br>0.5<br>16<br>128 | DD 10 µg                                                                                                                                                                                                     | 87.8         | NA       | 0        | 0.8                                       | 12.1       | [102]     |
| 200 Gram-negative including                                                                                                                                                           | Etest              |                                                               |                            |                                    |                                    | DD E<br>DD B                                                                                                                                                                                                 | 75.8<br>78.8 | NA<br>NA | 0<br>0   | 75<br>47.1                                | 5.7<br>8.6 | [86]      |
| 228 isolates:<br>61 <i>Acinetobacter</i> spp<br>43 <i>Enterobacter</i> spp<br>26 <i>E. coli</i><br>42 <i>K. pneumoniae</i><br>56 <i>P. aeruginosa</i>                                 | AD                 | S≤2 µg/mL<br>R≥4 µg/mL<br><sup>3</sup> S≤4 µg/mL<br>R≥8 µg/mL | 0.5->128<br>µg/mL<br>11.8% | 1<br>1<br>2<br>1<br>2              | 2<br>≥128<br>2<br>2<br>4           | DD MH-<br>10µg <sup>11</sup> S≤8-<br>R>11mm<br>DD MH-<br>10µg <sup>22</sup> S≤10-<br>R>14mm<br>DD ISO-<br>25µg <sup>33</sup> R≤14mm<br><i>P. aeruginosa</i><br>R≤13mm<br>DD MH-50<br>µg <sup>44</sup> R≤14mm |              | ND       |          | 81.5<br>44.4 <sup>#</sup><br>78.6<br>88.9 | 70.6       | [80]      |
| 246 isolates<br>0 mcr 1 2                                                                                                                                                             | MacroD<br>Colistin | S≤2 µg/mL<br>R≥4 µg/mL                                        | ≤0.5-8 µg/mL<br>11.8%      |                                    |                                    | Etest<br>Polymyxin B                                                                                                                                                                                         | 97.5         | 96.7     | 0.5      | 17.2                                      |            | [121]     |

17

18
